# Supplementary material for: Blood Pressure in relation to 24-Hour Urinary Sodium and Potassium Excretion in a Uruguayan Population Sample
Source: Hindawi journal article supplement (doi:10.1155/2018/6956078), 2018-12-02

## **SUPPLEMENTARY MATERIAL**

### **Blood pressure in relation to 24-hour urinary sodium and potassium excretion in a Uruguayan population sample**

Paula Moliterno, Ramón Álvarez-Vaz, Matias Pécora, Leonella Luzardo, Luciana Borgarello, Alicia Olascoaga, Carmen Marino Donangelo, Oscar Noboa, Jan A. Staessen, and José Boggia<sup>\*</sup>.

\*Correspondance to:

Email: [jboggia@hc.edu.uy](mailto:jboggia@hc.edu.uy)

Number of Tables 2 Figures 1

Correspondence should be addressed to:  
José Boggia MD, PhD  
Centro de Nefrología y Depto de Fisiopatología  
Av.Italia 2870, Piso 14 Ala Oeste. PC 11600  
Montevideo, Uruguay

Cel:+598 9919 1146 Fax +598 24809850  
Email: [jboggia@hc.edu.uy](mailto:jboggia@hc.edu.uy)

**Table S1: Blood pressure, urine osmolality and urea excretion according to levels of sodium intake within or above recommendation**

| <b>Mean (SD) characteristic</b> | <b>&lt; 2.0 g/day</b> | <b>≥ 2.0 g/day</b> | <b>P</b> |
|---------------------------------|-----------------------|--------------------|----------|
| Office BP (mm Hg)               |                       |                    |          |
| Systolic BP                     | 114.5±12.6            | 121.1±14.8         | 0.20     |
| Diastolic BP                    | 78.7±6.7              | 78.1±9.9           | 0.87     |
| Urinary Osmolality (Mosm/Kg)    | 231.9±41.5            | 437.2±129.7        | <0.0001  |
| Urinary urea excretion (g/day)  | 13.5±4.6              | 23.3± 8.8          | 0.016    |
| Urine Volume (L/24-h)           | 1.27±0.71             | 1.54±0.64          | 0.22     |

Estimates and SD express variables associated to levels of sodium intake in the whole population excluding those under hypertension treatment (n=9; n=101). To convert sodium from mg to mmol divide by 22.99.

**Table S2: Characteristics of participants (n=149) by blood pressure cluster**

| Variable                              | Cluster 1<br>N=47 | Cluster 2<br>N=23 | Cluster 3<br>N=34 | Cluster 4<br>N=45 | P value<br>( <i>Chi</i> <sup>2</sup> or ANOVA) |
|---------------------------------------|-------------------|-------------------|-------------------|-------------------|------------------------------------------------|
| Number (%) with characteristic        |                   |                   |                   |                   |                                                |
| Female                                | 33 (22.2)         | 8 (5.4)           | 25 (16.8)         | 23 (15.4)         | 0.0068                                         |
| Current smoking                       | 11 (7.4)          | 0 (0)             | 9 (6.0)           | 10 (6.7)          | 0.048                                          |
| Drinking alcohol                      | 18 (12.1)         | 9 (6.0)           | 13 (8.7)          | 19 (12.8)         | 0.83                                           |
| Hypertension                          | 26 (17.5)         | 14 (9.4)          | 4 (2.7)           | 10 (6.7)          | <0.0001                                        |
| On antihypertensive drugs             | 19 (73.0)         | 11 (78.6)         | 3 (75.0)          | 6 (60.0)          | 0.0002                                         |
| Diabetes mellitus                     | 5 (3.4)           | 6 (4.0)           | 0 (0)             | 3 (2.0)           | 0.0094                                         |
| Mean (SD) characteristic              |                   |                   |                   |                   |                                                |
| Age (y)                               | 64.9±11.2*        | 64.4±10.3         | 40.3±15.0         | 43.3±11.1         | <0.0001                                        |
| Height (cm)                           | 159.8±9.4         | 167.7±10.0        | 163.7±13.2        | 166.4±8.4         | 0.0045                                         |
| Weight (kg)                           | 67.7±12.5         | 81.9±12.1         | 66.3±12.0         | 82.6±14.1         | <0.0001                                        |
| Body mass index (kg/m <sup>2</sup> )  | 26.5±4.1          | 29.0±2.7          | 25.0±5.3          | 29.8±4.9          | <0.0001                                        |
| Waist-to-hip ratio                    | 0.90±0.065*       | 0.95±0.075        | 0.84±0.075        | 0.92±0.075        | <0.0001                                        |
| Office blood pressure                 |                   |                   |                   |                   |                                                |
| Systolic pressure (mm Hg)             | 135.2±15.1*       | 134.2±14.5        | 106.0±8.8         | 122.5±9.9         | <0.0001                                        |
| Diastolic pressure (mm Hg)            | 82.5±8.7*         | 82.0±9.6          | 71.3±7.3          | 80.5±9.9          | <0.0001                                        |
| Heart rate (beats per minute)         | 69.5±9.9          | 69.9±12.1         | 73.9±9.8          | 71.9±7.4          | 0.24                                           |
| Fasting glucose (mg/dL)               | 99.9±30.9*        | 99.6±15.2         | 86.2±6.8          | 92.7±11.4         | 0.013                                          |
| Serum cholesterol (mg/dL)             | 219.0±42.6        | 225.0±44.5        | 204.1±40.0        | 202.2±35.7        | 0.056                                          |
| Triglyceride to HDLc ratio            | 2.99±1.87         | 3.08±2.52         | 2.01±1.22         | 3.98±3.32         | 0.0059                                         |
| UNa (mmol/day)                        | 112.9±30.6        | 177.1±45.6        | 115.3±31.0        | 210.8±42.2        | <0.0001                                        |
| UK (mmol/day)                         | 45.2±11.8         | 84.7±18.0         | 43.2±12.4         | 60.2±13.1         | <0.0001                                        |
| Sodium to potassium ratio             | 2.66±1.13         | 2.16±0.69         | 2.92±1.22         | 3.65±1.11         | <0.0001                                        |
| Urinary creatinine excretion (mg/day) | 1152.0±321.4      | 1729.3±543.4      | 1189.7±350.9      | 1641.3±478.1      | <0.0001                                        |
| Urinary urea excretion (g/day)        | 18.3±7.1          | 29.6±9.5          | 18.2±5.4          | 25.9±6.9          | <0.0001                                        |
| eGFR (mL/min/1.73 m <sup>2</sup> )    | 83.1±20.1*        | 82.1±17.3         | 104.7±15.0        | 103.1±18.2        | <0.0001                                        |

Abbreviations: HDLc (high density lipoprotein cholesterol), UNa (urinary sodium excretion), UK (urinary potassium excretion), eGFR (estimated glomerular filtration rate). Hypertension was a blood pressure of at least 140 mm Hg systolic or 90 mm Hg diastolic, or use of antihypertensive drugs. Diabetes mellitus was a self-reported diagnosis, a fasting plasma glucose of 126 mg/dL or higher, or use of antidiabetic drugs. eGFR was derived from the Chronic Kidney Disease Epidemiology Collaboration equation. \**P*<0.01 for difference between cluster 1 and 3.

Figure S1: Dendrogram of hierarchical cluster analysis using 24-hour urinary sodium and potassium excretion, age and office systolic blood pressure.

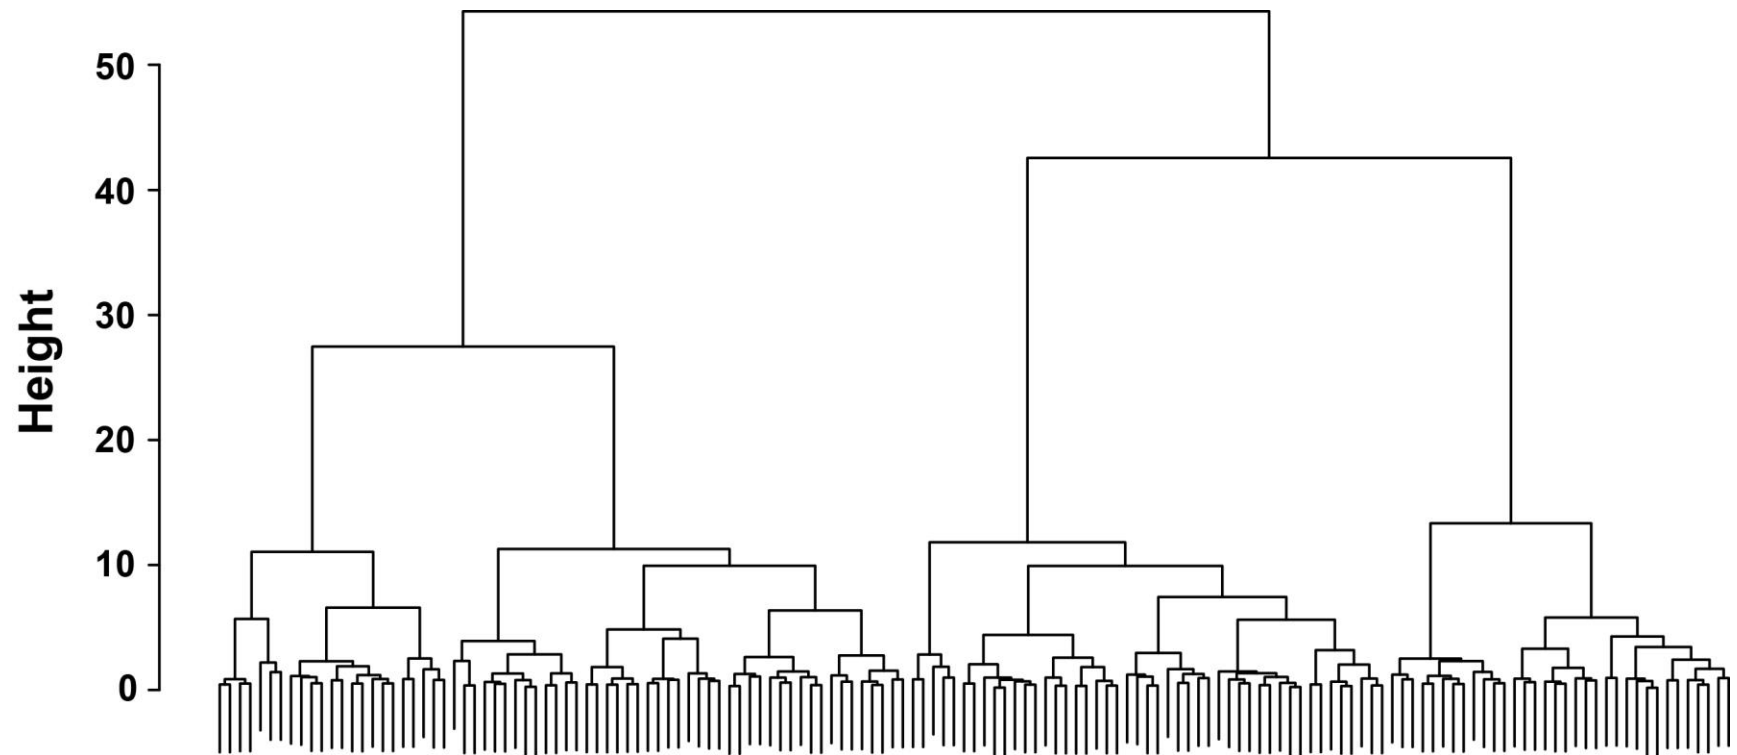

Supplement: f1 [file 6956078.f1.pdf]
